# Supplementary material for: Inhibition of cancer-type amino acid transporter LAT1 suppresses B16-F10 melanoma metastasis in mouse models
Source: PubMed Central journal article supplement (PMC10457391; doi:10.1038/s41598-023-41096-3), 2023-08-25
Supplement: 41598_2023_41096_MOESM1_ESM.pdf [file 41598_2023_41096_MOESM1_ESM.pdf]

## Supplementary Figure S1

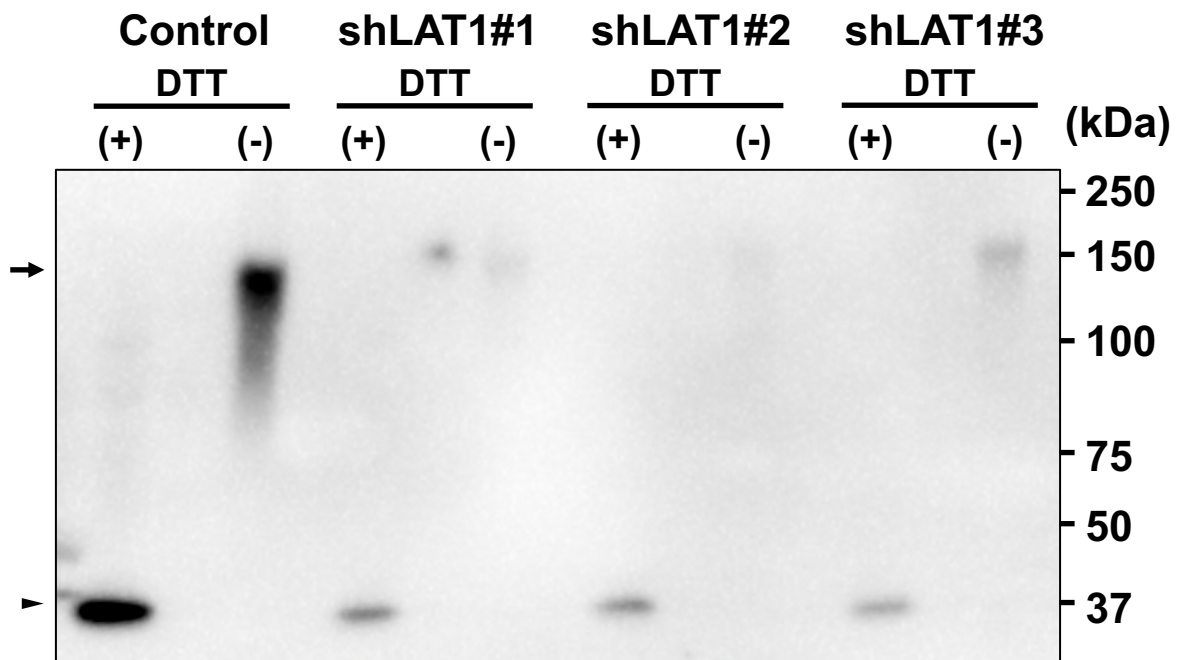

**IB: anti-LAT1**

**Supplementary Figure S1. Confirmation of LAT1 knockdown in B16-F10 cells.** Western blot analysis of LAT1-knockdown B16-F10 cells. Expression of LAT1 in B16-F10 cells transfected with control shRNA or LAT1 shRNA (shLAT1 #1, #2, and #3) was detected using an anti-LAT1 antibody under reducing (DTT(+)) and non-reducing (DTT(-)) conditions. Arrows indicate the bands corresponding to the LAT1-4F2hc heterodimer at 150 kDa. Black arrowheads indicate the bands of LAT1 monomers (37 kDa).

## Supplementary Figure S2

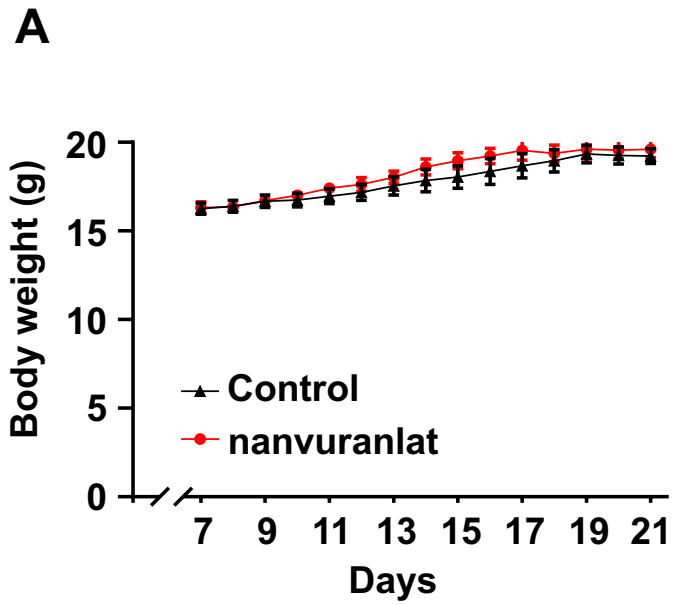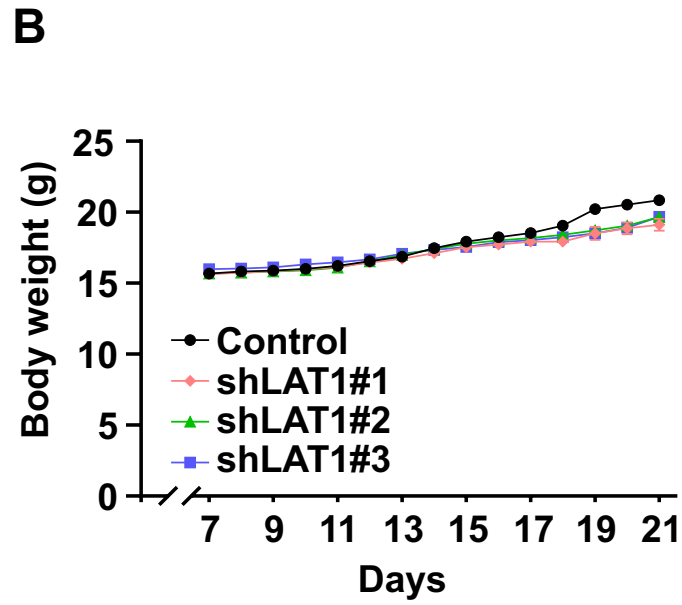

**Supplementary Figure S2. Body weight of B16-F10 tumor-bearing mice.**

**A.** Body weight of mice during two weeks of nanvuranlat administration. **B.**

Body weight of mice during a two-week observation period in each B16-F10 shLAT1 cell group.

# Supplementary Figure S3

**A**

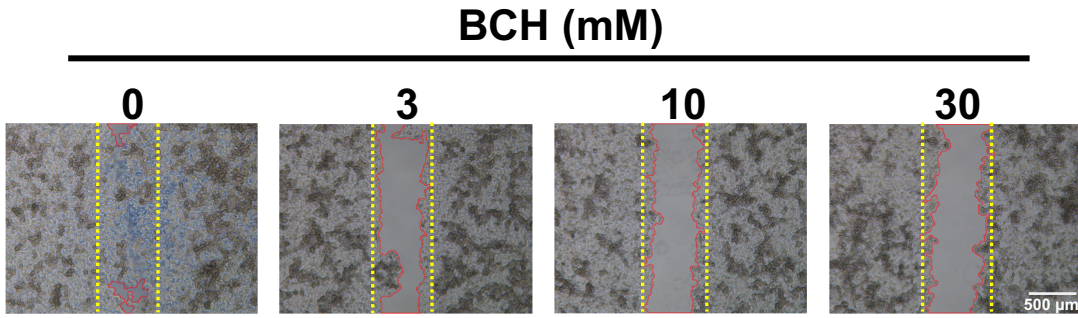

**B**

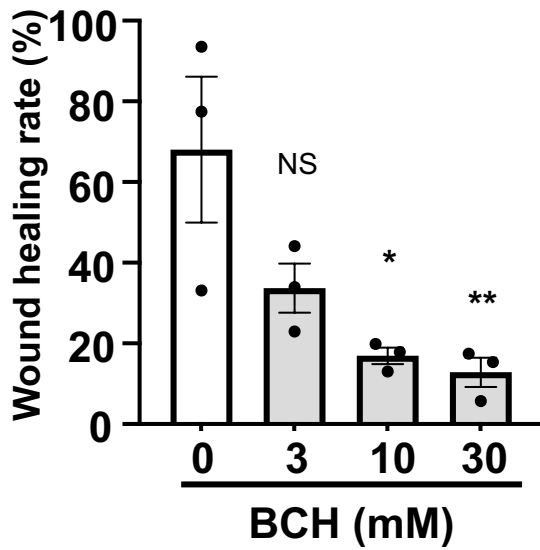

**C**

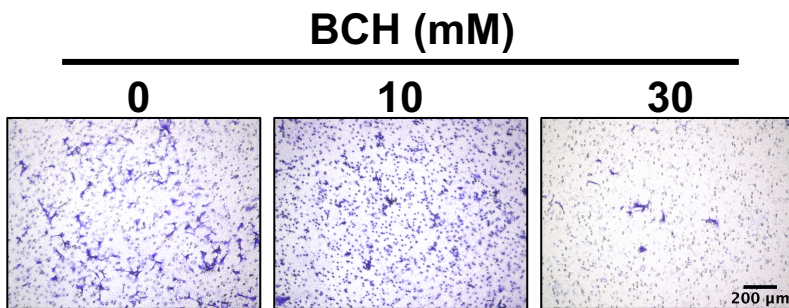

**D**

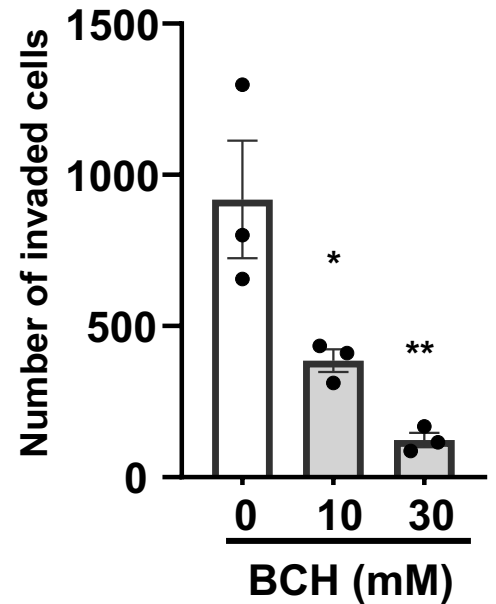

**Supplementary Figure S3. Suppression of cell migration and invasion by BCH.** **A.** Suppression of B16-F10 cell migration by BCH. A wound healing assay of B16-F10 cells was performed with BCH treatment (3, 10, and 30 mM). Images display representative results of BCH-treated B16-F10 cells. Cells were allowed to migrate for 8 hours (the yellow dotted line represents the initial position of the cell edge, and the cell edges at 8 hours are outlined in red). **B.** Quantification of the wound healing rate of BCH-treated B16-F10 cells. **C.** Suppression of cell invasion by BCH. Images show invaded B16-F10 cells after 24 hours of BCH treatment. **D.** Quantification of the number of invaded cells in BCH-treated B16-F10 cells.

Statistical significance was determined using one-way ANOVA followed by Tukey's post-test (n=3, NS, not significant, \*  $p < 0.05$ , \*\*  $p < 0.01$ ). Data are presented as mean  $\pm$  SEM. Scale bars: A, 500  $\mu\text{m}$ ; C, 200  $\mu\text{m}$ .



## Supplementary Figure S4

**A**

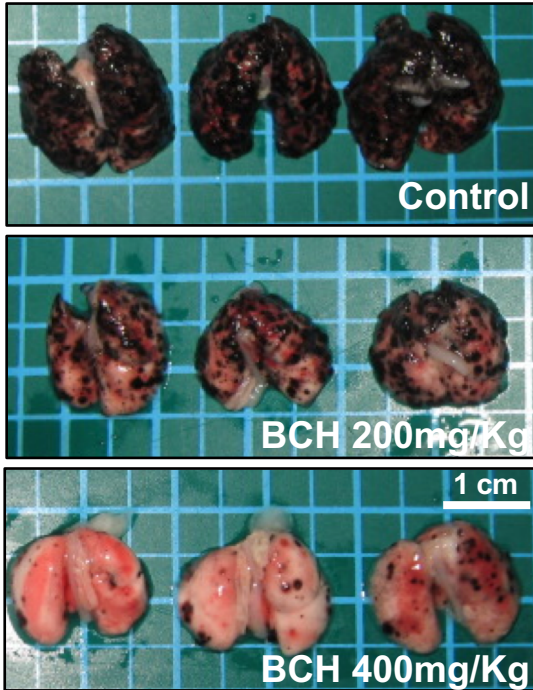

**B**

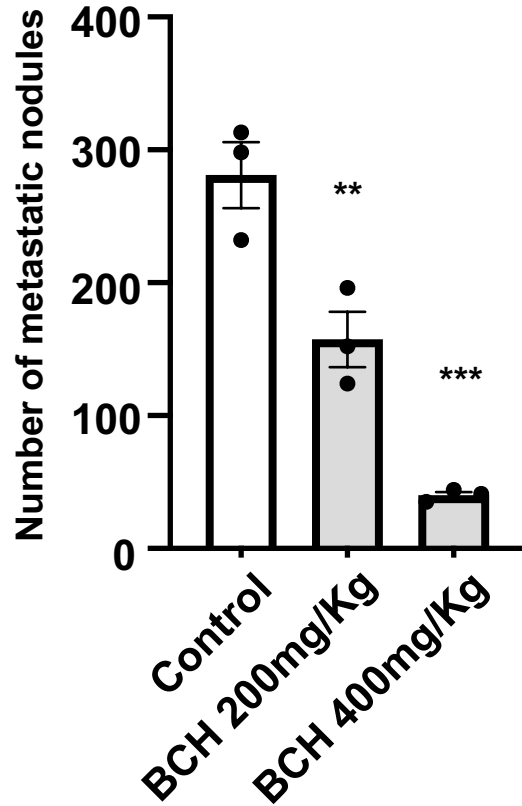

**Supplementary Figure S4. Inhibition of B16-F10 lung metastasis by BCH in *in vivo* lung metastasis model.** *A.* BCH suppressed B16-F10 lung metastasis compared to the control. Images display the lungs of control (saline) and BCH-treated mice (*i.v.*, 200 or 400 mg/kg, daily, 14 days). *B.* Quantification of metastatic nodules in control (saline) or BCH treatment groups.

Statistical significance was determined using one-way ANOVA followed by Tukey's post-test ( $n=3$ , \*\*  $p < 0.01$ , \*\*\*  $p < 0.001$ ). Data are presented as mean  $\pm$  SEM.

# Supplementary Figure S5

**A**

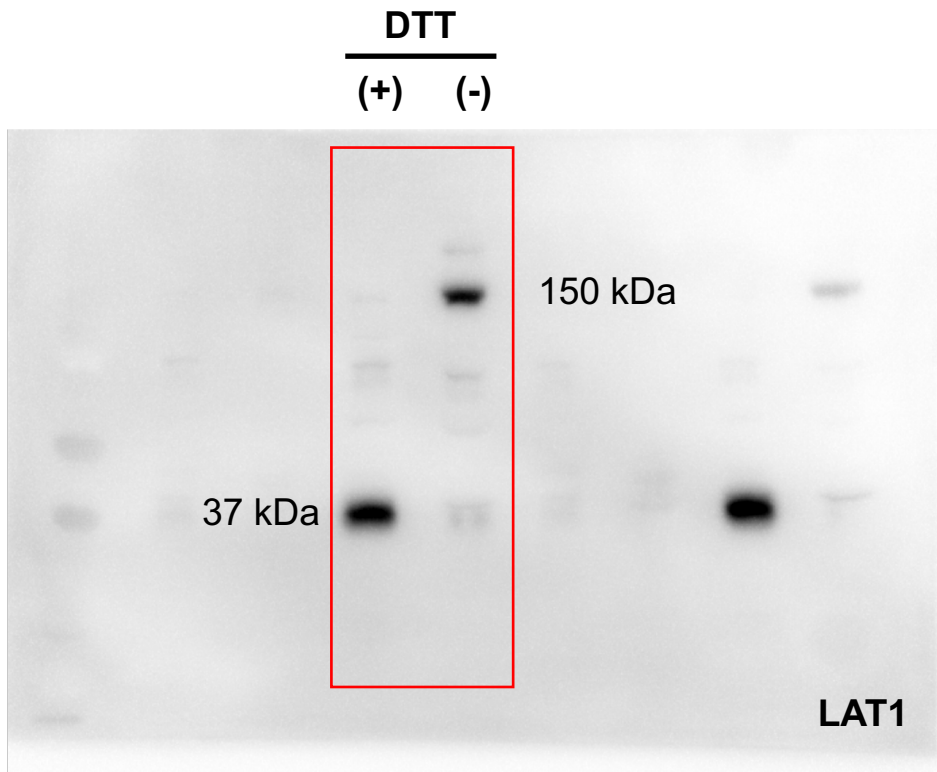

**B**

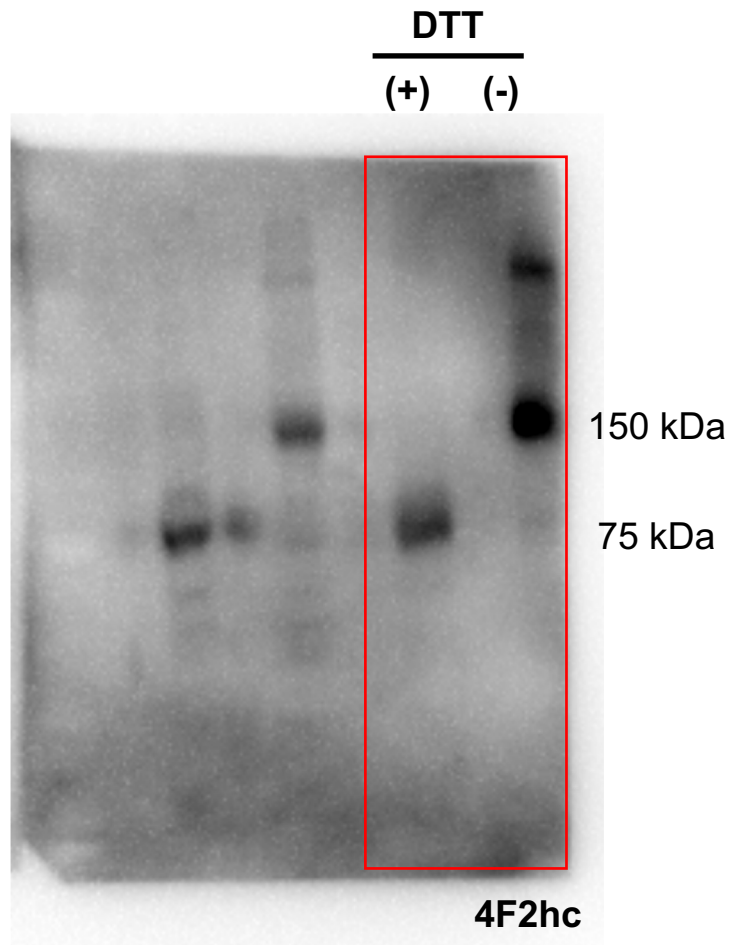

**C**

110 kDa

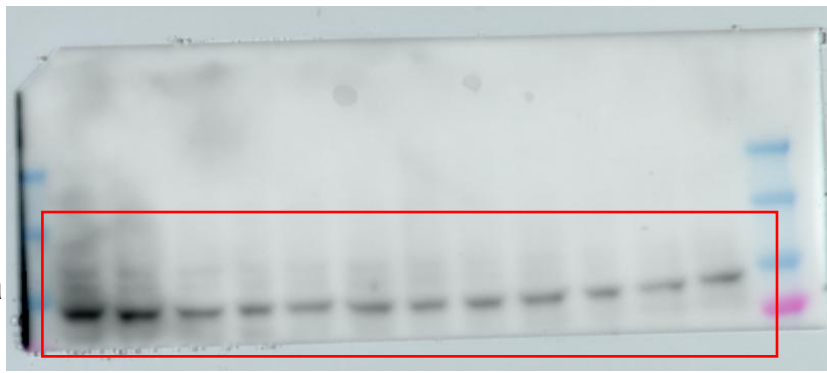**integrin  $\alpha v$** **D**

42 kDa

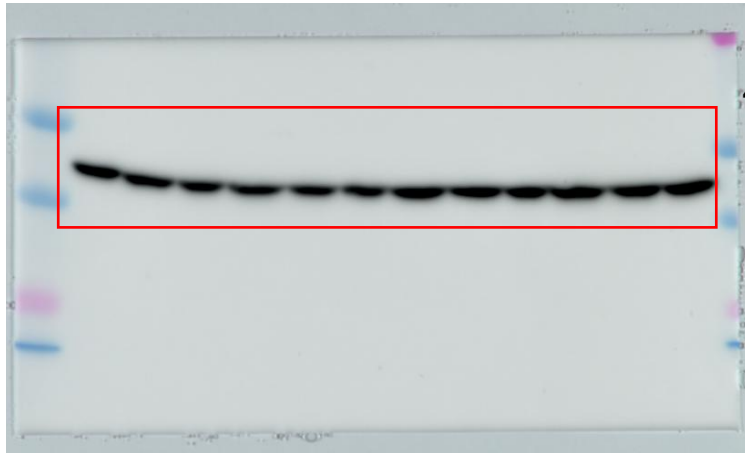 **$\beta$  actin, upper panel****E**

125 kDa

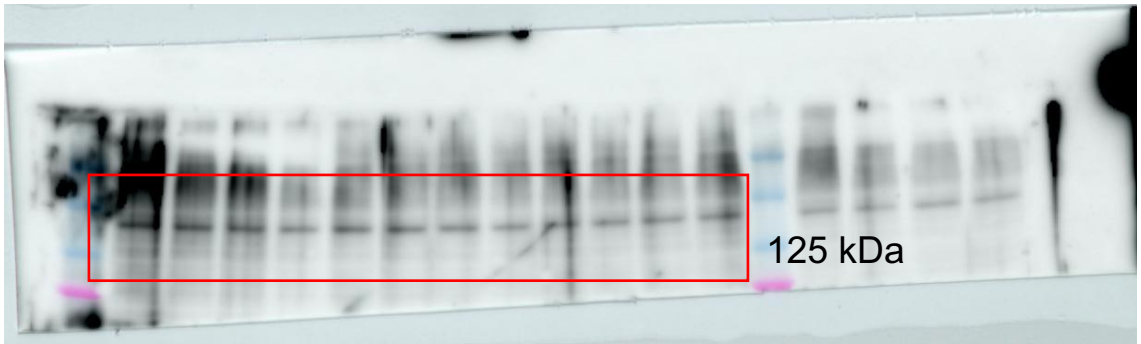**integrin  $\beta 3$** **F**

42 kDa

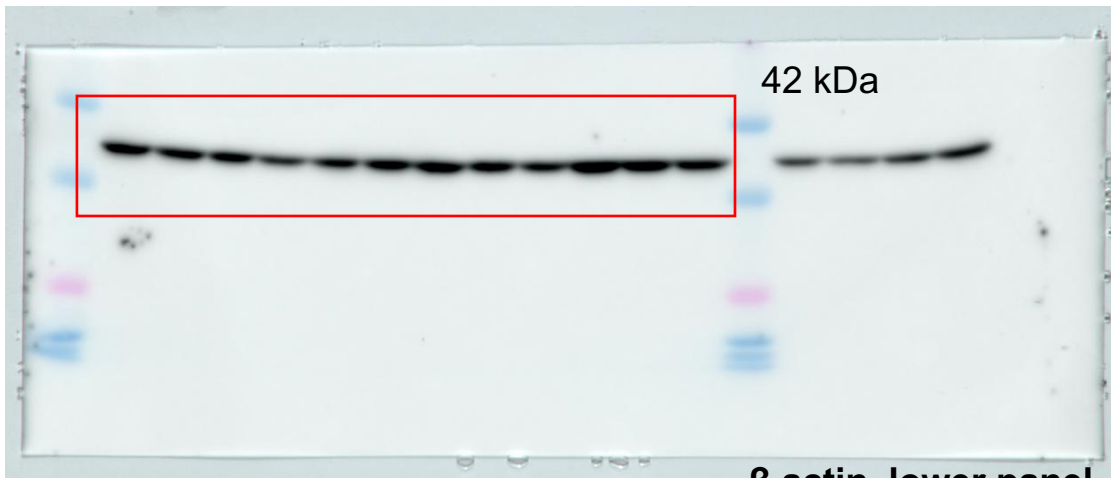 **$\beta$  actin, lower panel**

**G**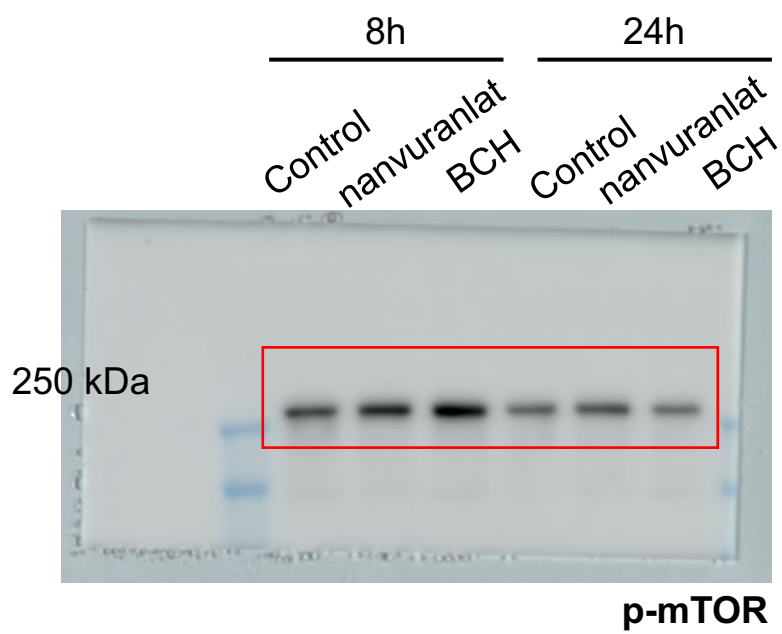**H**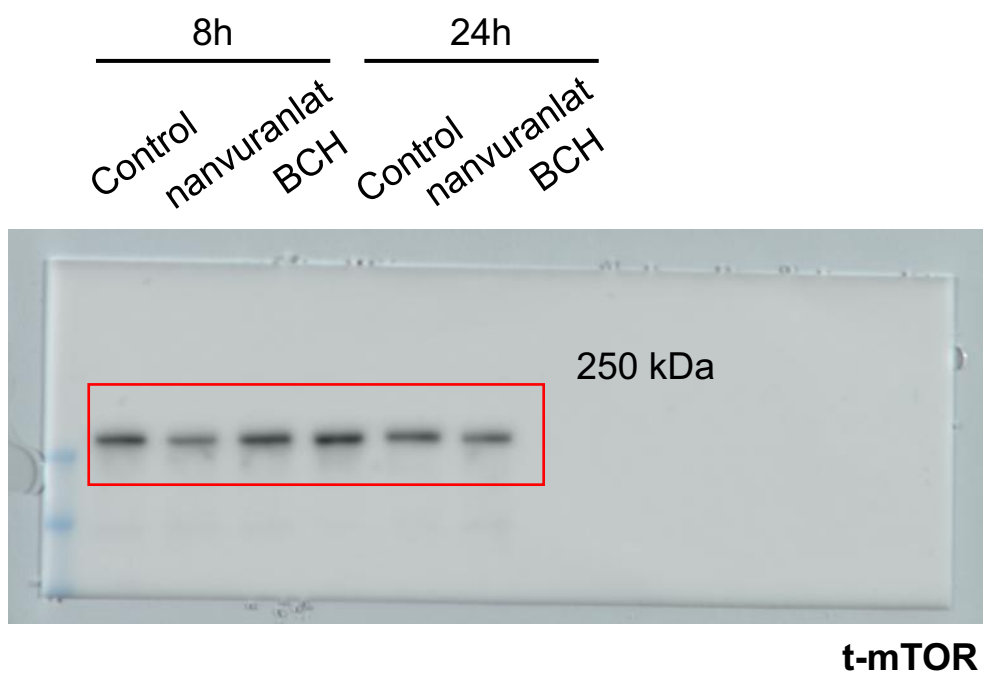

**I**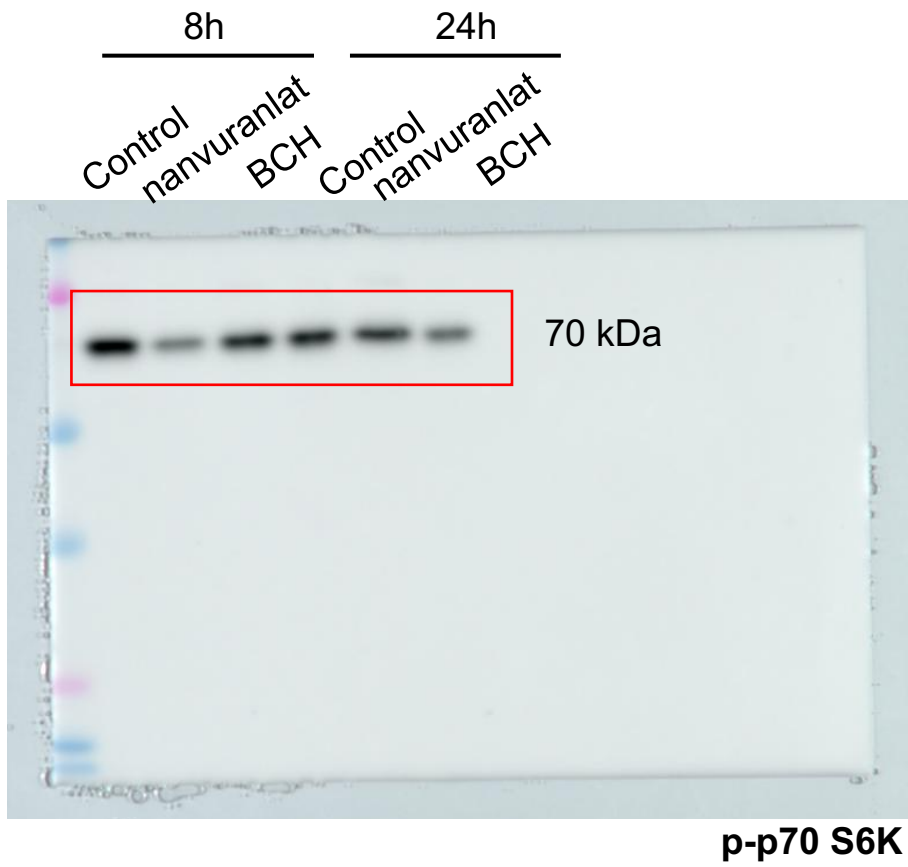**J**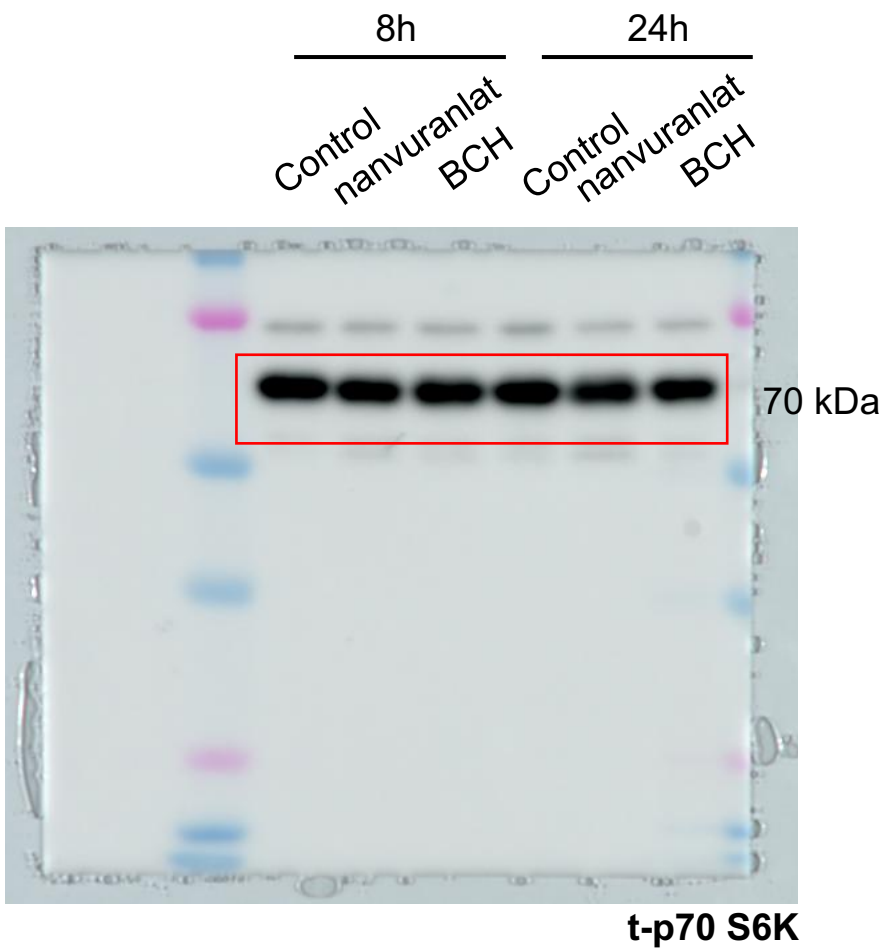

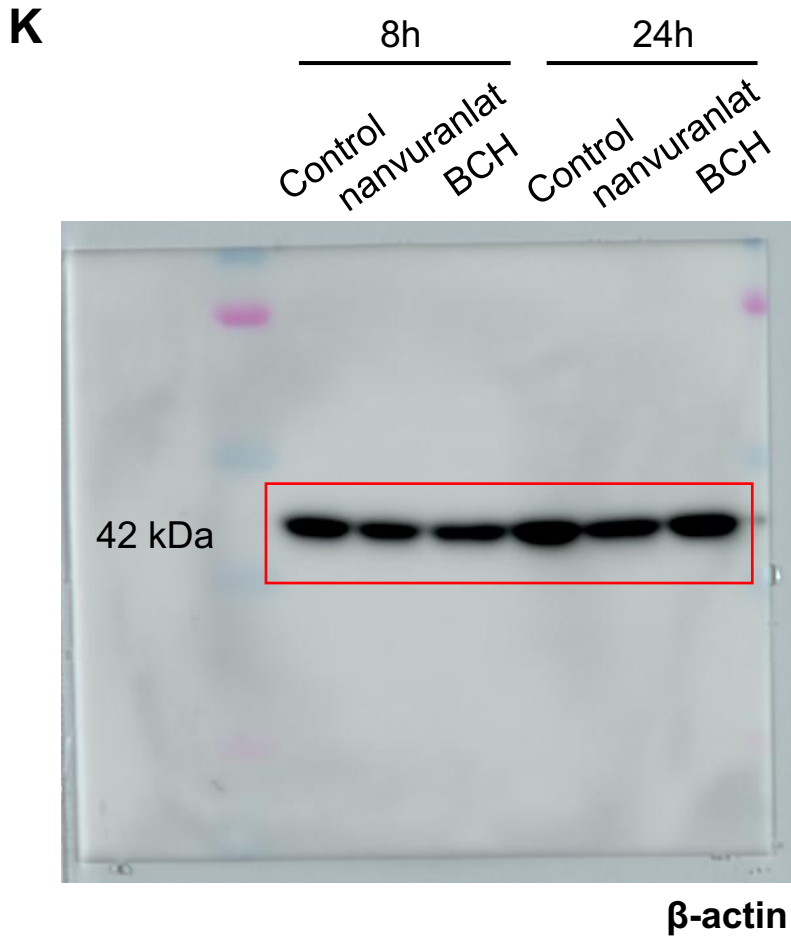

**Supplementary Figure S5. Original, uncropped electrophoretic blots. A.** LAT1 (Fig.1B). **B.** 4F2hc (Fig.1B). **C.** integrin  $\alpha v$  (Fig. 7B). **D.**  $\beta$  actin (Fig. 7B, upper panel). **E.** integrin  $\beta 3$  (Fig. 7B). **F.**  $\beta$  actin (Fig. 7B, lower panel). **G.** p-mTOR (Fig. 7D). **H.** t-mTOR (Fig. 7D). **I.** p-p70 S6K (Fig. 7D). **J.** t-p70 S6K (Fig. 7D). **K.**  $\beta$  actin (Fig. 7D).
